# Supplementary material
Source: PubMed Central journal article supplement (PMC8478465)
Supplement: aem.00948-21-s0001.pdf [file aem.00948-21-s0001.pdf]

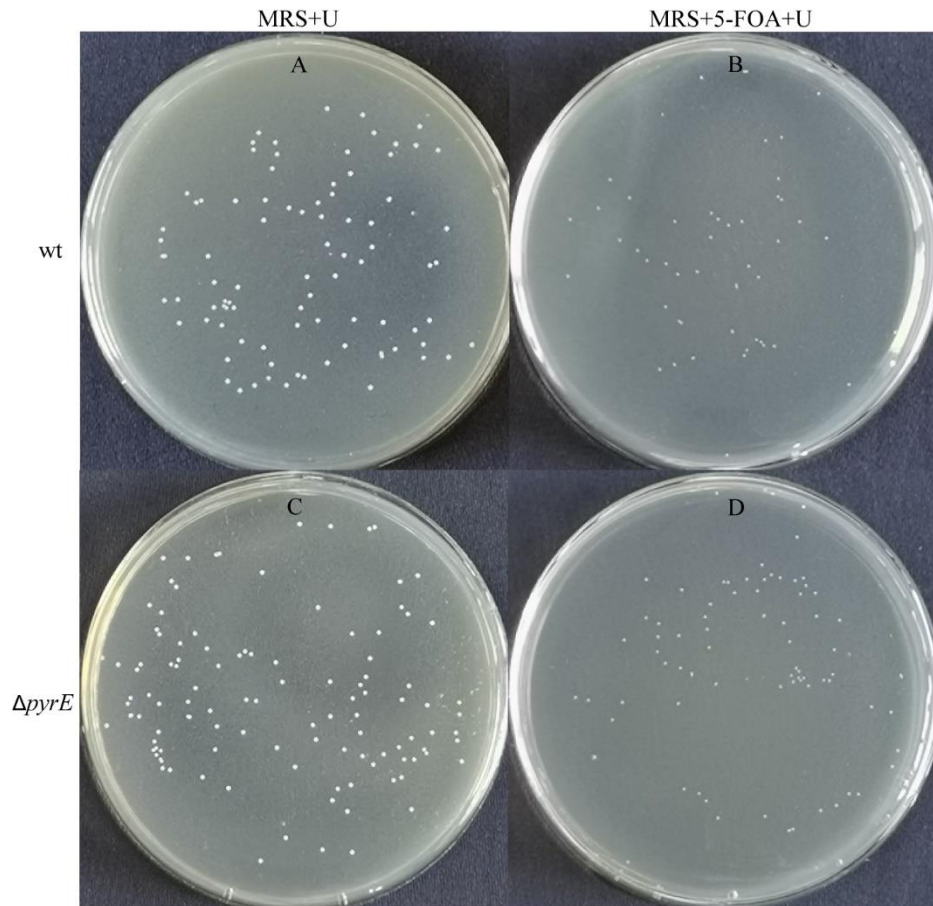

**FIG S1** Verification of counter-selection function of *pyrE* gene marker. (A and B) Colonies of the wildtype strain *P. acidilactici* LA412 (wt) formed in modified MRS medium containing 20  $\mu\text{g/mL}$  U alone or both 2  $\text{mg/mL}$  5-FOA and 20  $\mu\text{g/mL}$  U. (C and D) Colonies of the  $\Delta pyrE$  strain formed in modified MRS medium containing 20  $\mu\text{g/mL}$  U alone or both 2  $\text{mg/mL}$  5-FOA and 20  $\mu\text{g/mL}$  U. U, Uracil; 5-FOA, 5-fluoroorotic acid.

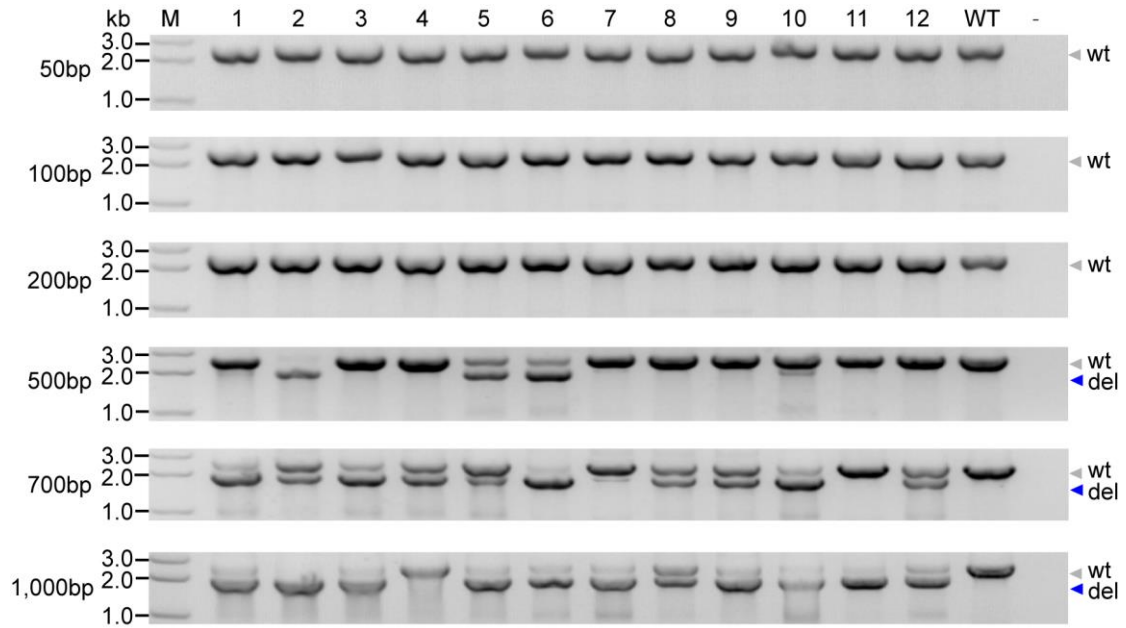

**FIG S2** PCR validation of *pyrE* gene deletion in 12 randomly selected transformants (lane 1 to 12) containing editing plasmids with donor DNAs whose length ranged from 50 bp to 1,000 bp (50, 100, 200, 500, 700, and 1,000 bp, respectively). M, DNA ladder; WT, control group with *P. acidilactici* LA412 total DNA as template; and “-”, control group with ddH<sub>2</sub>O as the template. wt, wildtype band; and del, *pyrE*-deleted band. The sizes for upstream/downstream donors are indicated on the left.

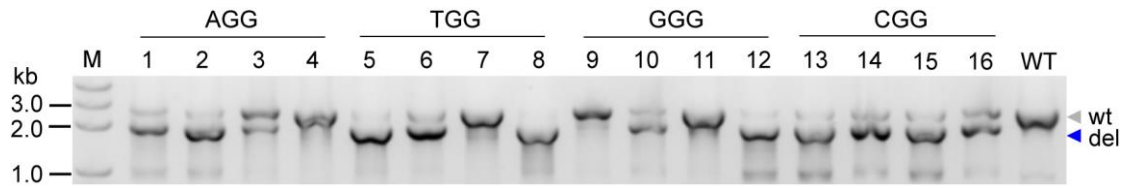

**FIG S3** Agarose gel analysis of PCR products of *pyrE* gene locus amplified from the single colonies carrying the *pyrE* gene-deleting plasmids with 700 bp donor in the *cas9*-corrected strain (*P. acidilactici* LA412*cas9*). Four protospacers with different adjacent PAMs (AGG, TGG, GGG, or CGG) were targeted. M, DNA ladder; WT, control group with *P. acidilactici* LA412 total DNA as the template. “wt” and “del” indicate the bands of wildtype *pyrE* gene and the deleted gene, respectively.
